# Supplementary material for: Structural isomerism of Ru(ii)-carbonyl complexes: synthesis, characterization and their antitrypanosomal activities
Source: Royal Society of Chemistry journal article supplement (doi:10.1039/c7nj00125h), 2017-01-01
Supplement: c7nj00125h1.pdf [file c7nj00125h1.pdf]

## Supporting Information

**Table S1.** Crystal data and structure refinement for *ct*-[RuCl(CO)(dppb)(bipy)]PF<sub>6</sub> (**1**) and *cc*-[RuCl(CO)(dppb)(phen)]PF<sub>6</sub> (**6**).

**Table S2.** Selected angles for for *ct*-[RuCl(CO)(dppb)(bipy)]PF<sub>6</sub> and *cc*-[RuCl(CO)(dppb)(bipy)]PF<sub>6</sub>.

**Table S3.** Contributions, %, of the composing atoms in the frontier orbitals of the Ru-complexes *ct*-[RuCl(CO)(dppb)(bipy)]PF<sub>6</sub> (**1**), *tc*-[RuCl(CO)(dppb)(bipy)]PF<sub>6</sub> (**3**) and *cc*-[RuCl(CO)(dppb)(bipy)]PF<sub>6</sub> (**5**) calculated using the B3LYP/[Ru:SDD;C,H,P,N,Cl:6-311+G\*\*] approach.

**Table S4.** Natural Bonding Orbitals (NBO) charges on the Ru and Ru-bound atoms of the complexes *tc*-[RuCl(CO)(dppb)(bipy)]PF<sub>6</sub> (**3**), *cc*-[RuCl(CO)(dppb)(bipy)]PF<sub>6</sub> (**5**), and *ct*-[RuCl(CO)(dppb)(bipy)]PF<sub>6</sub> (**1**), calculated using the B3LYP/[Ru:SDD;C,H,P,N,Cl:6-311+G\*\*] approach.

**Figure S1.** (C) <sup>13</sup>C{<sup>1</sup>H} NMR spectrum of *ct*-[RuCl(CO)(dppb)(bipy)]PF<sub>6</sub> complex in DMSO-*d*<sub>6</sub> at 300 K (A) Expanded regions of 110 – 200 ppm, (B) 5 – 30 ppm at different times.

**Figure S2.** (C) <sup>13</sup>C{<sup>1</sup>H} NMR spectrum of *cc*-[RuCl(CO)(dppb)(bipy)]PF<sub>6</sub> isomer in DMSO-*d*<sub>6</sub> at 300 K, (A) Expanded regions of 120 – 210 ppm and (B) 21 – 31 ppm at different times.

**Figure S3.** (C) <sup>13</sup>C{<sup>1</sup>H} NMR spectrum of *tc*-[RuCl(CO)(dppb)(bipy)]PF<sub>6</sub> complex in DMSO-*d*<sub>6</sub> at 300 K. (A) Expanded regions of 110 – 200 ppm and (B) 23 – 31 ppm at different times.

**Figure S4.** A) <sup>31</sup>P{<sup>1</sup>H} NMR spectrum of solution after electrolysis of *ct*-[RuCl(CO)(dppb)(bipy)]PF<sub>6</sub> isomer in CH<sub>3</sub>CN and B) cyclic voltammogram of the *ct*-[RuCl(CH<sub>3</sub>CN)(dppb)(bipy)]PF<sub>6</sub> in CH<sub>3</sub>CN.

**Figure S5.** A) <sup>31</sup>P{<sup>1</sup>H} spectrum of solution after electrolysis of *tc*-[RuCl(CH<sub>3</sub>CN)(dppb)(bipy)]PF<sub>6</sub> carried out for 3 h; B) cyclic voltammogram of *tc*-[RuCl(CH<sub>3</sub>CN)(dppb)(bipy)]PF<sub>6</sub>, C) <sup>31</sup>P NMR spectra of solution after electrolysis of *cc*-[RuCl(CO)(dppb)(bipy)]PF<sub>6</sub> for 4 h and D) cyclic voltammogram of *cc*-[RuCl(CH<sub>3</sub>CN)(dppb)(bipy)]PF<sub>6</sub>. Conditions: Pt electrode vs Ag/AgCl, TBAP 0.1 mol L<sup>-1</sup> in CH<sub>3</sub>CN.

**Figure S6.** <sup>13</sup>C{<sup>1</sup>H} NMR spectra of electrolysis products. A) *ct*-[RuCl(CH<sub>3</sub>CN)(dppb)(bipy)]PF<sub>6</sub>, B) *tc*-[RuCl(CH<sub>3</sub>CN)(dppb)(bipy)]PF<sub>6</sub> and C) *cc*-[RuCl(CH<sub>3</sub>CN)(dppb)(bipy)]PF<sub>6</sub> in DMSO-*d*<sub>6</sub>.

**Table S1.** Crystal data and structure refinement for *ct*-[RuCl(CO)(dppb)(bipy)]PF<sub>6</sub> (**1**) and *cc*-[RuCl(CO)(dppb)(phen)]PF<sub>6</sub> (**6**).

| Data                                       | Complex (1)                                                                        | Complex (6)                                                                        |
|--------------------------------------------|------------------------------------------------------------------------------------|------------------------------------------------------------------------------------|
| Empirical formula                          | C <sub>39</sub> H <sub>36</sub> ClF <sub>6</sub> N <sub>2</sub> OP <sub>3</sub> Ru | C <sub>41</sub> H <sub>36</sub> ClF <sub>6</sub> N <sub>2</sub> OP <sub>3</sub> Ru |
| Molecular weight                           | 892.13                                                                             | 916.15                                                                             |
| Color                                      | Yellow                                                                             | Yellow                                                                             |
| Crystal system                             | Monoclinic                                                                         | Monoclinic                                                                         |
| Space group                                | P21/c                                                                              | P21/c                                                                              |
| Unit cell dimensions (Å; °)                | a = 14.6581(2)<br>b = 16.2338(2);<br>c = 16.5500(2)<br>β = 92.759(1)               | a = 12.4950(4) Å<br>b = 16.3401(6);<br>c = 19.2663(6)<br>β = 101.08                |
| Volume (Å <sup>3</sup> )                   | 3933.62(9)                                                                         | 3860.2(2)                                                                          |
| Unit cell, Z                               | 4                                                                                  | 4                                                                                  |
| Crystal size (mm <sup>3</sup> )            | 0.22 x 0.22 x 0.19                                                                 | 0.05 x 0.09 x 0.40                                                                 |
| Density (calculated; Mg/m <sup>3</sup> )   | 1.506                                                                              | 1.576                                                                              |
| Temperature (K)                            | 293(2)                                                                             | 293(2)                                                                             |
| Absorption coefficient (mm <sup>-1</sup> ) | 0.651                                                                              | 0.666                                                                              |
| F(000)                                     | 1808                                                                               | 1856                                                                               |
| Wavelength (Mo-Kα) (Å)                     | 0.71073                                                                            | 0.71073                                                                            |
| Theta range for data collection (°)        | 3.10 to 32.03                                                                      | 2.963 to 26.374                                                                    |
| Index ranges                               | -18 ≤ h ≤ 18;<br>-20 ≤ k ≤ 20;<br>-21 ≤ l ≤ 24                                     | -15 ≤ h ≤ 15;<br>-20 ≤ k ≤ 20;<br>-24 ≤ l ≤ 24                                     |
| Completeness to theta                      | 79.6 %                                                                             | 99.4 %                                                                             |
| Reflections collected                      | 10900                                                                              | 28914                                                                              |
| Data / restraints / parameters             | 10900 / 478                                                                        | 7863 / 0 / 496                                                                     |
| R1; wR2 [I > 2σ (I)]                       | R1 = 0.0533, wR2 = 0.1388                                                          | R1 = 0.0589; wR2 = 0.1338                                                          |
| R1; wR2 (Total)                            | R1 = 0.0783, wR2 = 0.1659                                                          | R = 0.0589; R <sup>w</sup> = 0.1338                                                |
| S                                          | 1.074                                                                              | 1.201                                                                              |
| Largest diff. peak and hole                | 0.803 and -1.178                                                                   | 0.453 and -0.931                                                                   |

**Table S2.** Selected angles for for *ct*-[RuCl(CO)(dppb)(bipy)]PF<sub>6</sub> and *cc*-[RuCl(CO)(dppb)(phen)]PF<sub>6</sub>.

| <i>ct</i> -[RuCl(CO)(dppb)(bipy)]PF <sub>6</sub> |            | <i>cc</i> -[RuCl(CO)(dppb)(phen)]PF <sub>6</sub> |            |
|--------------------------------------------------|------------|--------------------------------------------------|------------|
| Angles [°]                                       |            | Angles [°]                                       |            |
| C(1)-Ru-N(1)                                     | 89.11(12)  | C(1)-Ru-N(1)                                     | 169.54(14) |
| C(1)-Ru-N(2)                                     | 86.98(13)  | C(1)-Ru-N(2)                                     | 91.79(14)  |
| N(1)-Ru-N(2)                                     | 77.11(12)  | N(2)-Ru-N(1)                                     | 77.93(11)  |
| C(1)-Ru-P(1)                                     | 88.54(11)  | C(1)-Ru-P(1)                                     | 94.87(12)  |
| N(1)-Ru-P(1)                                     | 105.90(8)  | N(2)-Ru-P(1)                                     | 89.79(9)   |
| N(2)-Ru-P(1)                                     | 174.57(8)  | N(1)-Ru-P(1)                                     | 87.14(8)   |
| C(1)-Ru-Cl                                       | 94.91(11)  | C(1)-Ru-P(2)                                     | 89.32(12)  |
| N(1)-Ru-Cl                                       | 168.63(8)  | N(2)-Ru-P(2)                                     | 170.33(9)  |
| N(2)-Ru-Cl                                       | 92.46(9)   | N(1)-Ru-P(2)                                     | 100.48(8)  |
| P(1)-Ru-Cl                                       | 84.87(3)   | P(1)-Ru-P(2)                                     | 99.68(3)   |
| C(1)-Ru-P(2)                                     | 173.00(12) | C(1)-Ru-Cl                                       | 92.28(12)  |
| N(1)-Ru-P(2)                                     | 92.54(7)   | N(2)-Ru-Cl                                       | 83.27(9)   |
| N(2)-Ru-P(2)                                     | 86.76(8)   | N(1)-Ru-Cl                                       | 84.64(8)   |
| P(1)-Ru-P(2)                                     | 97.53(3)   | P(1)-Ru-Cl                                       | 170.19(3)  |
| Cl-Ru-P(2)                                       | 82.24(3)   | P(2)-Ru-Cl                                       | 87.09(3)   |
| C(1)-Ru-P(2)                                     | 173.00(12) | C(1)-Ru-N(2)                                     | 91.79(14)  |
| N(1)-Ru-P(2)                                     | 92.54(7)   | C(1)-Ru-N(1)                                     | 169.54(14) |

**Table S3.** Contributions, %, of the composing atoms in the frontier orbitals of the Ru-complexes *ct*-[RuCl(CO)(dppb)(bipy)]PF<sub>6</sub> (**1**), *tc*-[RuCl(CO)(dppb)(bipy)]PF<sub>6</sub> (**3**) and *cc*-[RuCl(CO)(dppb)(bipy)]PF<sub>6</sub> (**5**) calculated using the B3LYP/[Ru:SDD;C,H,P,N,Cl:6-311+G\*\*] approach.

| <b>Species</b>    | <b>HOMO</b>                 | <b>LUMO</b>        |
|-------------------|-----------------------------|--------------------|
| <b>(3)</b> opt.   | (C+H) 87                    | (C=O) 27; (C+H) 56 |
| <b>(5)</b> opt.   | (C+H) 93                    | (C=O) 11; (C+H) 82 |
| <b>(1)</b> opt.   | Ru: 54; Cl: 34;<br>(C+H) 10 | N: 20; (C+H) 77    |
| <b>(1)</b> X-ray* | Ru: 58; Cl: 33              | N: 17; (C+H) 80    |

\**ct*-[RuCl(CO)(dppb)(bipy)]PF<sub>6</sub> complex calculated using X-ray coordinates.

**Table S4.** Natural Bonding Orbitals (NBO) charges on the Ru and Ru-bound atoms of the complexes *tc*-[RuCl(CO)(dppb)(bipy)]PF<sub>6</sub> (**3**), *cc*-[RuCl(CO)(dppb)(bipy)]PF<sub>6</sub> (**5**), and *ct*-[RuCl(CO)(dppb)(bipy)]PF<sub>6</sub> (**1**), calculated using the B3LYP/[Ru:SDD;C,H,P,N,Cl:6-311+G\*\*] approach.

| atoms | complex 3<br>(opt.) | complex 5<br>(opt.) | complex 1<br>(opt.) | complex 1<br>(X-Ray)* |
|-------|---------------------|---------------------|---------------------|-----------------------|
| Ru    | -1.38               | -1.28               | -0.66               | -0.87                 |
| N1    | -0.40               | -0.69               | -0.36               | -0.36                 |
| N2    | -0.35               | -0.30               | -0.37               | -0.37                 |
| P1    | 2.79                | 1.01                | 1.20                | 1.30                  |
| P2    | 1.02                | 0.62                | 1.09                | 1.17                  |
| Cl    | -0.27               | -0.26               | -0.40               | -0.35                 |
| C(CO) | 0.62                | 0.60                | 0.77                | 0.77                  |
| O     | -0.50               | -0.63               | -0.44               | -0.42                 |

\**ct*-[RuCl(CO)(dppb)(bipy)]PF<sub>6</sub> complex calculated using X-ray coordinates.

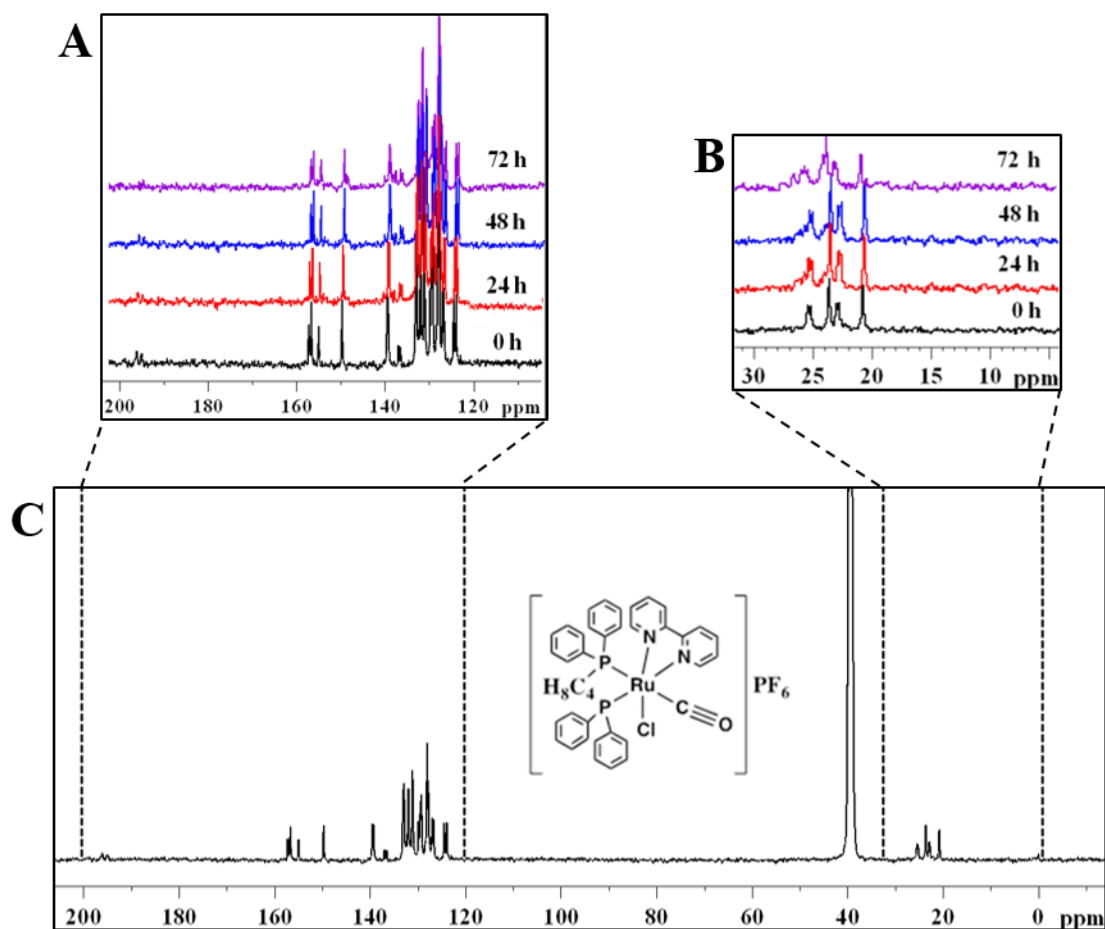

**Figure S1.** (C)  $^{13}\text{C}\{^1\text{H}\}$  NMR spectrum of  $ct\text{-}[\text{RuCl}(\text{CO})(\text{dppb})(\text{bipy})]\text{PF}_6$  complex in  $\text{DMSO-}d_6$  at 300 K (A) Expanded regions of 110 – 200 ppm, (B) 5 – 30 ppm at different times.

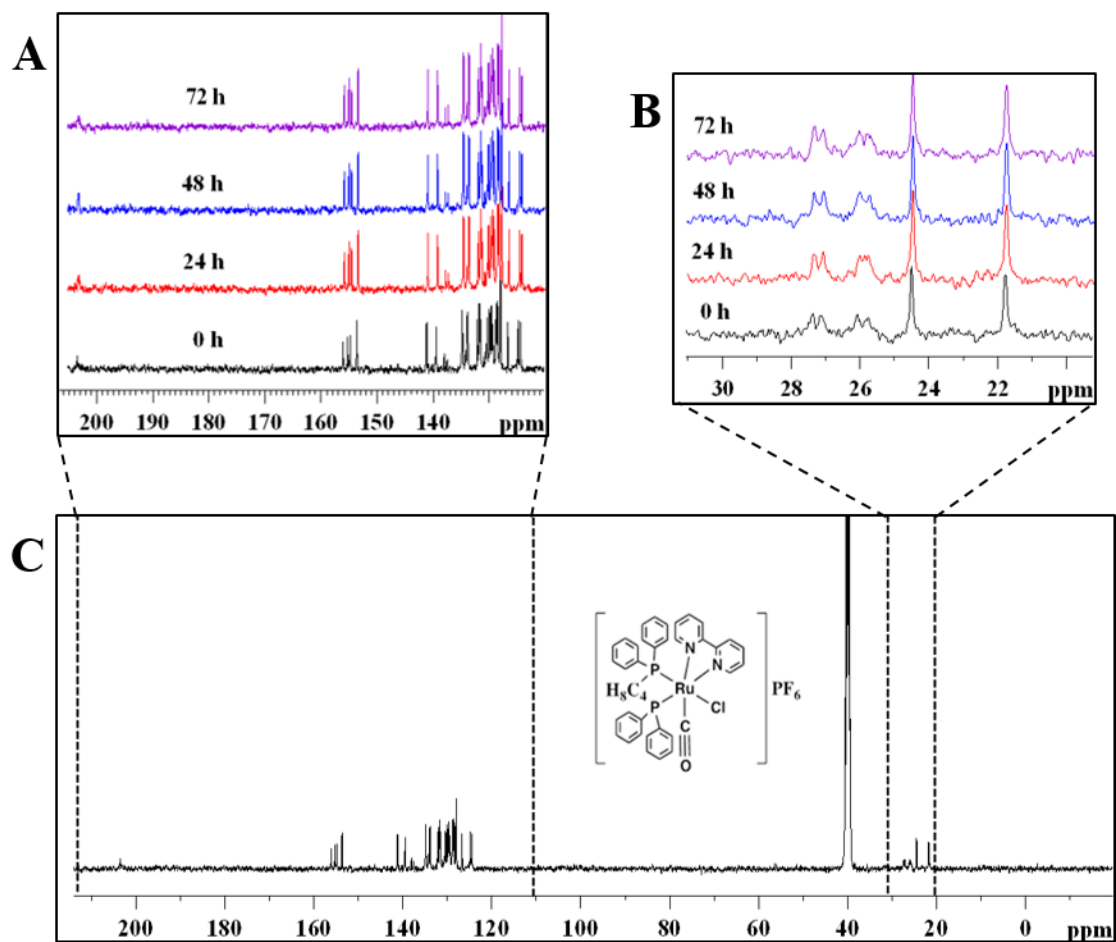

**Figure S2.** (C)  $^{13}\text{C}\{^1\text{H}\}$  NMR spectrum of  $cc$ -[RuCl(CO)(dppb)(bipy)]PF<sub>6</sub> isomer in DMSO-*d*<sub>6</sub> at 300 K, (A) Expanded regions of 120 – 210 ppm and (B) 21 – 31 ppm at different times.



**Figure S3.** (C)  $^{13}\text{C}\{^1\text{H}\}$  NMR spectrum of  $tc\text{-}[\text{RuCl}(\text{CO})(\text{dppb})(\text{bipy})]\text{PF}_6$  complex in  $\text{DMSO-}d_6$  at 300 K. (A) Expanded regions of 110 – 200 ppm and (B) 23 – 31 ppm at different times.



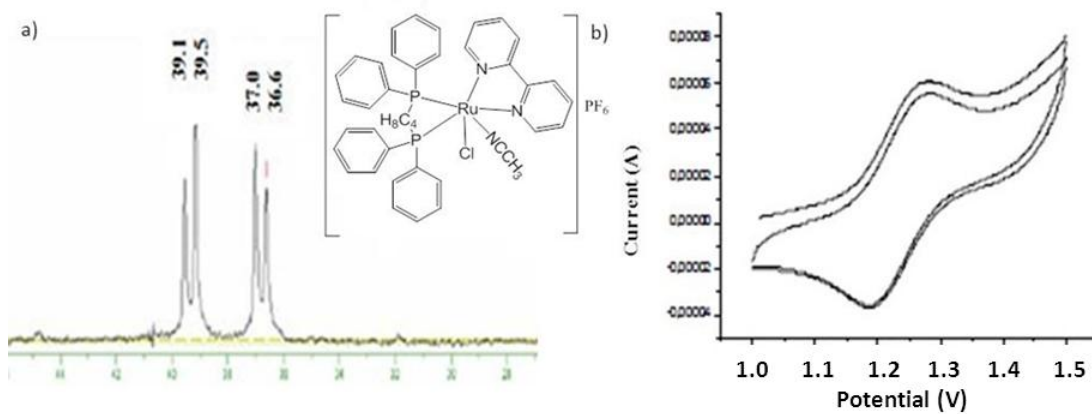

**Figure S4.** A)  $^{31}\text{P}\{^1\text{H}\}$  NMR spectrum of solution after electrolysis of *ct*- $[\text{RuCl}(\text{CO})(\text{dppb})(\text{bipy})]\text{PF}_6$  isomer in  $\text{CH}_3\text{CN}$  and B) cyclic voltammogram of the *ct*- $[\text{RuCl}(\text{CH}_3\text{CN})(\text{dppb})(\text{bipy})]\text{PF}_6$  in  $\text{CH}_3\text{CN}$ .

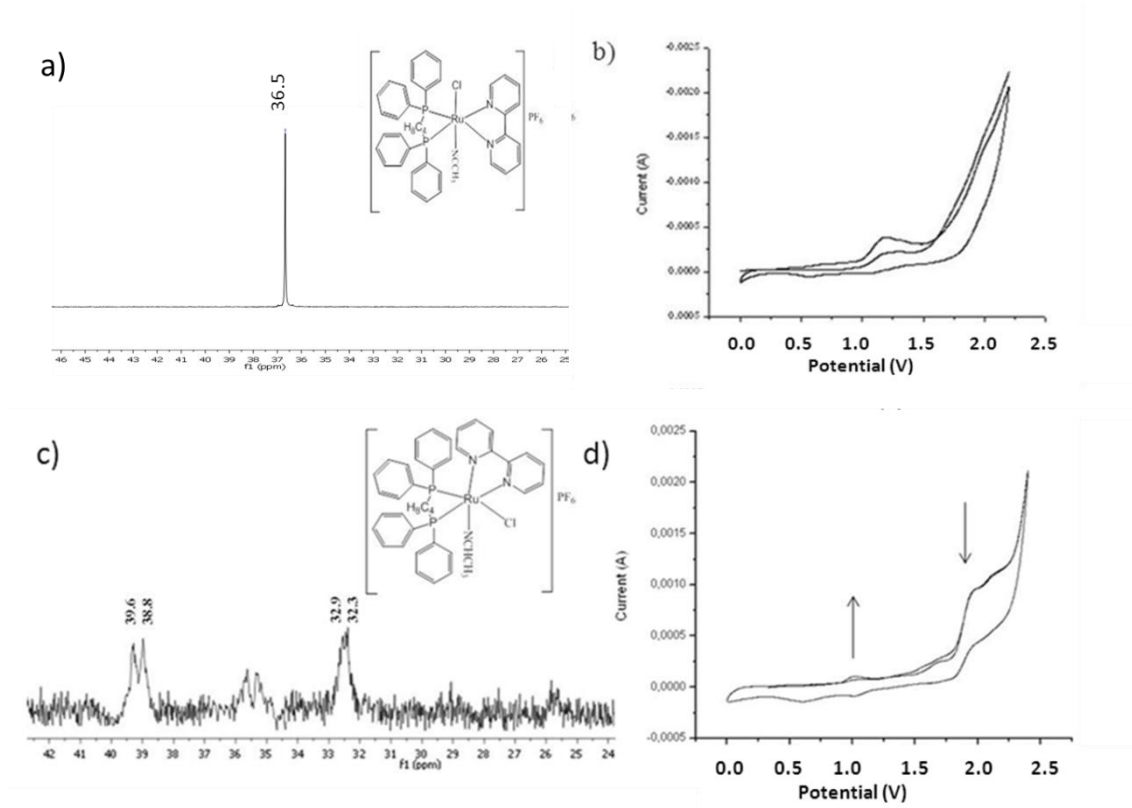

**Figure S5.** A)  $^{31}\text{P}\{^1\text{H}\}$  spectrum of solution after electrolysis of *tc*-[RuCl(CH<sub>3</sub>CN)(dppb)(bipy)]PF<sub>6</sub> carried out for 3 h; B) cyclic voltammogram of *tc*-[RuCl(CH<sub>3</sub>CN)(dppb)(bipy)]PF<sub>6</sub>; C)  $^{31}\text{P}$  NMR spectra of solution after electrolysis of *cc*-[RuCl(CH<sub>3</sub>CN)(dppb)(bipy)]PF<sub>6</sub> for 4 h and D) cyclic voltammogram of *cc*-[RuCl(CH<sub>3</sub>CN)(dppb)(bipy)]PF<sub>6</sub>. Conditions: Pt electrode vs Ag/AgCl, TBAP 0.1 mol L<sup>-1</sup> in CH<sub>3</sub>CN.

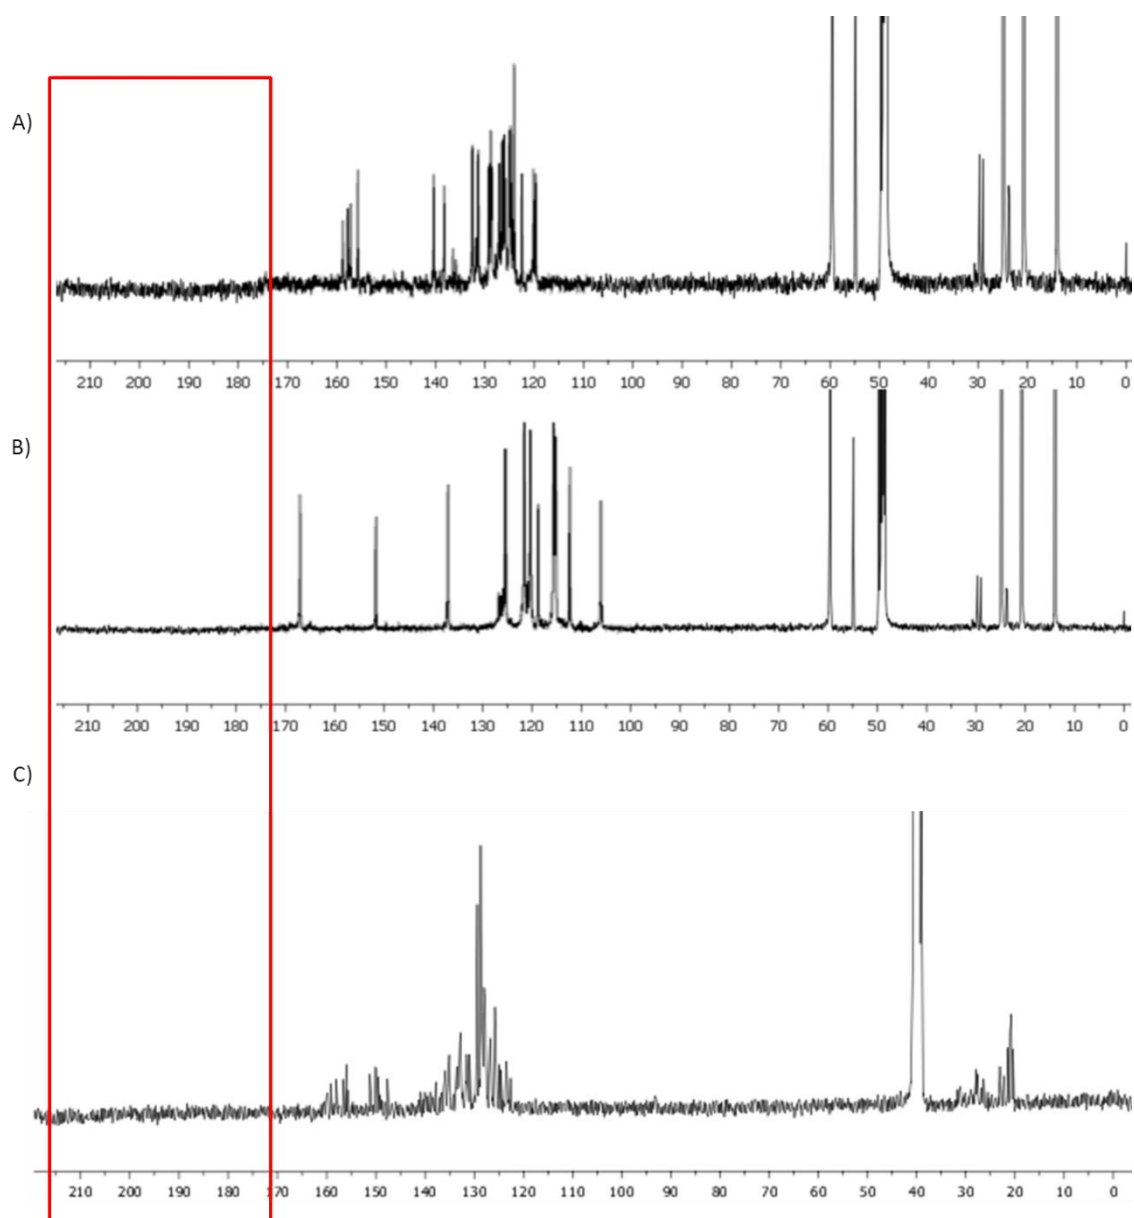

**Figure S6.**  $^{13}\text{C}\{^1\text{H}\}$  NMR spectra of electrolysis products. A) *ct*- $[\text{RuCl}(\text{CH}_3\text{CN})(\text{dppb})(\text{bipy})]\text{PF}_6$ , B) *tc*- $[\text{RuCl}(\text{CH}_3\text{CN})(\text{dppb})(\text{bipy})]\text{PF}_6$  and C) *cc*- $[\text{RuCl}(\text{CH}_3\text{CN})(\text{dppb})(\text{bipy})]\text{PF}_6$ .
